# Supplementary material for: Honduran Reef Island Shoreline Change and Planform Evolution over the Last 15 Years: Implications for Reef Island Monitoring and Futures
Source: MDPI journal article supplement (doi:10.3390/rs15194787), 2023-09-30
Supplement: s1 [file s1]

**Table S1.** Satellite georeferencing error, human error (calculated as specified in Methods), pixel size and overall Root Mean Square Error (RMSE) for each shoreline for Utila and Cayos Cochinos reef islands.

|                            | Image and Shoreline<br>Date | Georectification<br>error | Human<br>Error | Pixel<br>Size | Shoreline<br>RMSE |
|----------------------------|-----------------------------|---------------------------|----------------|---------------|-------------------|
| <b>Utila Cays</b>          |                             |                           |                |               |                   |
| South West Cay             | 23/01/2019                  | 0.58                      | 0.23           | 0.17          | 0.37              |
|                            | 30/06/2016                  | 0.20                      | 0.23           | 0.17          | 0.20              |
|                            | 06/07/2013                  | 0.27                      | 0.23           | 0.17          | 0.23              |
|                            | 06/06/2010                  | 0.31                      | 0.23           | 0.17          | 0.25              |
| Sandy Cay                  | 23/01/2019                  | 0.44                      | 0.23           | 0.18          | 0.30              |
|                            | 30/06/2016                  | 0.29                      | 0.23           | 0.18          | 0.24              |
|                            | 06/07/2013                  | 0.24                      | 0.23           | 0.18          | 0.22              |
|                            | 22/03/2013                  | 0.25                      | 0.23           | 0.18          | 0.22              |
|                            | 06/06/2010                  | 0.24                      | 0.23           | 0.18          | 0.22              |
| Water Cay                  | 23/01/2019                  | 0.49                      | 0.23           | 0.22          | 0.34              |
|                            | 30/06/2016                  | 0.14                      | 0.23           | 0.22          | 0.20              |
|                            | 06/07/2013                  | 0.19                      | 0.23           | 0.22          | 0.21              |
|                            | 22/03/2013                  | 0.20                      | 0.23           | 0.22          | 0.22              |
|                            | 06/06/2010                  | 0.19                      | 0.23           | 0.22          | 0.21              |
|                            | 12/08/2006                  | 0.18                      | 0.23           | 0.22          | 0.21              |
| Little Cay A               | 21/01/2019                  | 0.40                      | 0.23           | 0.50          | 0.39              |
|                            | 30/06/2016                  | 0.32                      | 0.23           | 0.50          | 0.37              |
|                            | 06/07/2013                  | 0.28                      | 0.23           | 0.50          | 0.35              |
|                            | 22/03/2013                  | 0.35                      | 0.23           | 0.50          | 0.38              |
|                            | 06/06/2010                  | 0.33                      | 0.23           | 0.50          | 0.37              |
|                            | 12/08/2006                  | 0.41                      | 0.23           | 0.50          | 0.40              |
| Bells Cay                  | 06/07/2013                  | 0.28                      | 0.23           | 0.16          | 0.23              |
|                            | 22/03/2013                  | 0.36                      | 0.23           | 0.16          | 0.26              |
|                            | 06/06/2010                  | 0.33                      | 0.23           | 0.16          | 0.25              |
|                            | 12/08/2006                  | 0.36                      | 0.23           | 0.16          | 0.27              |
| Morgans Cay                | 23/01/2019                  | 0.28                      | 0.23           | 0.16          | 0.23              |
|                            | 30/06/2016                  | 0.23                      | 0.23           | 0.16          | 0.21              |
|                            | 06/07/2013                  | 0.31                      | 0.23           | 0.16          | 0.24              |
|                            | 22/03/2013                  | 0.26                      | 0.23           | 0.16          | 0.22              |
|                            | 06/06/2010                  | 0.25                      | 0.23           | 0.16          | 0.22              |
|                            | 12/08/2006                  | 0.27                      | 0.23           | 0.16          | 0.23              |
| Diamond Cay                | 30/06/2016                  | 0.37                      | 0.23           | 0.17          | 0.27              |
|                            | 06/07/2013                  | 0.30                      | 0.23           | 0.17          | 0.24              |
|                            | 22/03/2013                  | 0.28                      | 0.23           | 0.17          | 0.23              |
|                            | 06/06/2010                  | 0.33                      | 0.23           | 0.17          | 0.25              |
|                            | 12/08/2006                  | 0.58                      | 0.23           | 0.17          | 0.37              |
| <b>Cayos Cochinos Cays</b> |                             |                           |                |               |                   |
| Palamo                     | 17/03/2021                  | 0.37                      | 0.23           | 0.16          | 0.27              |
|                            | 08/10/2018                  | 0.25                      | 0.23           | 0.16          | 0.22              |
|                            | 17/10/2018                  | 0.56                      | 0.23           | 0.17          | 0.36              |
|                            | 31/05/2016                  | 0.24                      | 0.23           | 0.16          | 0.21              |
| Balfate                    | 17/03/2021                  | 0.29                      | 0.23           | 0.16          | 0.23              |
|                            | 17/10/2018                  | 0.77                      | 0.23           | 0.16          | 0.47              |
|                            | 31/05/2016                  | 0.55                      | 0.23           | 0.16          | 0.36              |
| Borrego                    | 17/03/2021                  | 0.33                      | 0.23           | 0.17          | 0.25              |
|                            | 17/10/2018                  | 0.48                      | 0.23           | 0.17          | 0.32              |
| Largo Abajo                | 17/03/2021                  | 0.28                      | 0.23           | 0.19          | 0.23              |
|                            | 17/10/2018                  | 0.13                      | 0.23           | 0.19          | 0.19              |
| Bolanos                    | 17/03/2021                  | 0.28                      | 0.23           | 0.17          | 0.23              |
|                            | 08/10/2018                  | 0.31                      | 0.23           | 0.17          | 0.24              |
|                            | 17/10/2018                  | 0.57                      | 0.23           | 0.17          | 0.37              |
| Zacate                     | 17/03/2021                  | 0.25                      | 0.23           | 0.17          | 0.22              |
|                            | 08/10/2018                  | 0.40                      | 0.23           | 0.17          | 0.28              |
|                            | 17/10/2018                  | 1.02                      | 0.23           | 0.17          | 0.61              |
| Timon                      | 17/03/2021                  | 0.23                      | 0.23           | 0.18          | 0.21              |
|                            | 08/10/2018                  | 0.52                      | 0.23           | 0.18          | 0.34              |

|              |            |      |      |      |      |
|--------------|------------|------|------|------|------|
|              | 17/10/2018 | 0.75 | 0.23 | 0.18 | 0.46 |
| Largo Arriba | 17/03/2021 | 0.85 | 0.23 | 0.19 | 0.52 |
|              | 17/10/2018 | 0.61 | 0.23 | 0.19 | 0.39 |
|              | 31/05/2016 |      | 0.23 | 0.19 | 0.17 |
| Chachauate   | 17/03/2021 | 0.35 | 0.23 | 0.21 | 0.27 |
|              | 17/10/2018 | 0.48 | 0.23 | 0.22 | 0.33 |
